# Supplementary material
Source: PubMed Central journal article supplement (PMC4024894)
Supplement: 1402030111_pnas.201402030SI.pdf [file 1402030111_pnas.201402030SI.pdf]

# Supporting Information

Streets et al. 10.1073/pnas.1402030111

## SI Materials and Methods

**Device Fabrication.** Microfluidic devices were fabricated with polydimethylsiloxane (PDMS) using standard multilayer soft lithography (1). Two molds, a control mold and a flow mold, were patterned on silicon wafers with photolithography. The silicon wafers were first thoroughly cleaned using acetone and isopropyl alcohol. The wafers were then baked at 150 °C for 30 min to dehydrate the surface. For the control mold, negative photoresist (SU8-2025; MicroChem) was poured onto the wafer directly and then spun at 3,500 rpm for 30 s, yielding a 25- $\mu\text{m}$  layer. Then, the wafer was baked on a hotplate for 3 min at 65 °C and 5 min at 95 °C. The resist-coated wafer was exposed to UV radiation through a negative mask (clear features and opaque background) imprinted with the control circuit using a photolithography aligner (JKG-2A; Shanghai Xueze Optics). After exposure, the wafer was again baked at 65 °C for 1 min and 95 °C for 2 min. The wafer was then submerged in SU-8 developer and gently agitated until the unexposed photoresist was removed, leaving the positive control features. Then, the wafer was carefully washed with isopropyl alcohol and blow-dried. The mold was baked at 150 °C for at least 3 h before further use.

The multiple-height flow mold was made from negative photoresist and positive photoresist. These wafers were treated with hexamethyldisilazane (Alfa Aesar) vapor for 5 min at room temperature after cleaning. The wafer was first spin-coated with the positive photoresist AZ4620 (AZ Electronic Materials) at 1,000 rpm for 30 s. After baking at 95 °C for 3 min and 105 °C for 6 min, the photoresist was then exposed to UV light through a high-resolution positive mask containing the flow circuit design and developed in AZ400K developer (diluted 1:2 developer: water). The positive photoresist was used for the channels with a height of 15  $\mu\text{m}$ . We then baked the mold again by ramping the hotplate from 95 °C to 220 °C at 6 °C/h for a total of 20 h to reflow the positive resist and create rounded channels. Negative photoresist (SU8-2025) was then used for building the reaction chambers using the same protocol as above but spin-coating the resist at 2,500 rpm for 30 s to achieve a height of 30  $\mu\text{m}$ .

PDMS (RTV-615; GE Advanced Materials) was cast on the master molds to make devices after all molds were exposed to trichloro-(1H,1H,2H,2H-perfluorooctyl) silane (Sigma-Aldrich) vapor for 10 min to facilitate PDMS releasing from the mold. These devices were designed in the push-down configuration. The PDMS mixture with a ratio of 20:1 (potting agent:cross-linking agent) was spin-coated onto the flow mold at 1,800 rpm for 60 s, and 30 g PDMS with a ratio of 5:1 (potting agent:cross-linking agent) was poured onto the control mold to make the thick upper layer of the device. The baking times of the flow and control layers were 15 and 30 min, respectively, at 80 °C. The thicker PDMS slab on the flow layer mold was then peeled off, and holes were punched for fluidic inlets using a 20-gauge rounded punch. The control layer slab was then aligned to the thin flow layer and baked at 80 °C for 60 min. The two bonded layers were peeled off from the flow mold, and then, holes for control line inlets were punched. A bottom dummy layer of PDMS was spun onto a clean silicon wafer at 2,000 rpm for 60 s and baked for 15 min at 80 °C. The dummy layer and two-layer chip were exposed to oxygen plasma for 30 s to remove all organic contaminants and prime the two layers for bonding. The chip was then quickly but carefully placed onto the dummy layer and baked for 2 h to complete the bonding. Finally, the assembled chip was cut from the dummy layer and bonded onto a glass coverslip with a thickness of 0.3 mm. The whole device was then baked at 80 °C for 15 min.

**Cell Culture and Single-Cell Suspension Preparation.** The feeder-independent mouse ES cells were from the 129 mouse strain. The cells were cultured in DMEM/F12 medium supplemented with 20% (vol/vol) FBS and containing 1% L-glucose, 1% non-essential amino acid, 1% Penicillin-Streptomycin (Invitrogen), 0.1%  $\beta$ -mercaptoethanol, 1% nucleic acids, 1% sodium pyruvate, 1.6% (vol/vol) sodium carbonate, and most importantly, 1,000 unit/mL ESGRO leukemia inhibitory factor (Chemicon). Mouse ES cells (mESCs) were cultured at 37 °C in a humidified incubator containing 5% (vol/vol) CO<sub>2</sub>. The cell culture was maintained by regular passaging with a treatment of 0.05 trypsin with 0.1% EDTA (Invitrogen) and centrifugation at 250  $\times$  g for 3 min. The mouse embryonic fibroblast cells were cultured with DMEM supplemented with 10% (vol/vol) FBS and 1% Penicillin-Streptomycin. All cells were cultured at 37 °C in a humidified incubator containing 5% (vol/vol) CO<sub>2</sub>. When cells became confluent, they were detached by 0.25% trypsin with 0.1% EDTA (Invitrogen; Life Technologies) and centrifuged at 250  $\times$  g for 3 min. Then, the supernatant was discarded, and cells were resuspended at a density of 2  $\times$  10<sup>7</sup> cells/mL for passage. For the single-cell sequencing experiment, the concentration of the cell suspension was adjusted to 5  $\times$  10<sup>5</sup>/mL using a hemocytometer. After thoroughly vortexing, 10  $\mu\text{L}$  this suspension was mixed with 40  $\mu\text{L}$  cold acetylated (Ac)-BSA-PBS solution, which was prepared by dissolving Ac-BSA (20 mg/mL) in PBS at 1 mg/mL (Ac-BSA: B8894; Sigma—Aldrich; 1 $\times$  PBS: 14249-95; Gibco). A typical cell suspension concentration for chip experiments was 10<sup>5</sup> cells/mL. In most experiments, around 5  $\mu\text{L}$  single-cell suspension was injected into the chip, although the full 5  $\mu\text{L}$  were rarely completely used, and it is possible to decrease this volume in situations where sample is limited.

**Device Design and Operation.** Before use, the microfluidic devices were baked at 150 °C for 30 min to inactivate any enzymes inside the channels. The single-cell suspension and all of the reagents used in the experiment were introduced into the device through the cell input and reagent input (Fig. 1A), respectively, by gel-loading aerosol-barrier tips (Thermo Fisher Scientific Inc.), which were pressurized with 10 psi. Before introducing the cells, flow channels were flushed with RNase/DNase free water (Ambion; Life Technologies) and incubated with 0.2% (wt/wt) Pluronic F-127 solution (P2443; Sigma-Aldrich) for 60 min at room temperature. After incubation, the flow channels were rinsed with RNase/DNase free water (Ambion; Life Technologies) and air-dried.

Before operation, all valves were filled and closed with 30 psi operating pressure. To begin, the cell channel and reagent input channel were primed with Ac-BSA-PBS, filling the trapping channels but leaving the sorting chambers and reaction chambers empty. The cell suspension was then introduced from the cell input, and single cells were directed to the eight trapping chambers sequentially with a peristaltic pump downstream of the cell input channel (Fig. 1B). If multiple cells or unhealthy looking cells were trapped, the isolation valve was reopened, and the unwanted cell was discarded to the waste output. After trapping a single cell, the Ac-BSA-PBS was pressurized from the reagent inlet and pushed the cell into the neighboring sorting chamber. This trapping and sorting process was repeated for the eight reaction lanes (Fig. S1F). One or two of these lanes were often used for a no-cell negative control. In this case, suspension buffer without a cell was pushed into the sorting chamber. After sorting, the device was placed onto a temperature-controlled platform (Fig. S1A) made from thermoelectric Peltier coolers, which was set to 4 °C. Mineral oil was used to increase thermal conductivity between the platform and glass coverslip. For each subsequent reaction, the reagent mix was

injected into the reagent input line, which was flushed and primed with new reagent. Each lane was then simultaneously pressurized, and the newly added reagent pushed the contents of the previous reaction into the following stage, filling the chamber and replacing the air that was pushed through the PDMS. A stereomicroscope was used to ensure complete filling for every reaction step.

After filling, the added reagents were mixed using large valves positioned above the reaction chambers (Fig. 1B). For stages 2–4, a linear mixing strategy was used, in which mixing pumps were alternately actuated, driving the reactants back and forth between the chambers (Fig. S1C). For stage 5, a connective channel formed a closed loop in the reaction chamber, and the mixing pumps could be used in a peristaltic manner to circulate the contents through the ring and accelerate diffusive mixing (2) (Fig. S1D). Mixing times for each step were as follows: 3 min for stages 2 and 3, 5 min for stage 4, and 10 min for stage 5. The mixing schemes were characterized with optical absorption measurements. After filling the lysis chamber with distilled water, the stage 2 valve was opened, and a blue dye was injected into the lysis chamber, pushing the water into the reverse transcription chamber and simulating the experimental procedure (Fig. S1E). Linear mixing was then initiated, and images of the chambers were recorded every 20 s for 2 min. The mean pixel intensity ( $I'$ ) within small regions in both chambers indicated in Fig. S1E was calculated for every time point. Using the Beer–Lambert law (Eq. S1), the relative concentration of dye ( $c'/c_f$ ) was calculated for each chamber and plotted in Fig. S1E:

$$\frac{I'}{I_0} = 10^{-\varepsilon lc'}, \quad \frac{c'}{c_f} = \frac{\log_{10} I'/I_0}{\log_{10} I_f/I_0} \quad [\text{S1}]$$

Here,  $\varepsilon$  is the dye's extinction coefficient,  $l$  is the depth of the chamber,  $I_0$  is the incident intensity measured in a region outside of the chambers, and the subscript  $f$  denotes a chamber with pure dye. At least 100 s of linear mixing with a pumping frequency of 3 Hz were necessary to completely mix stages 1 and 2. To ensure thorough mixing, we extended the mixing times by two to five times the duration determined by this calculation. Placing a flexible valve above the reaction chambers increases the fluidic capacitance of the chamber. To prevent inflation of the chamber volume during filling, the pump valves were activated, and the operating pressure was reduced to match the flow pressure of  $\sim 10$  psi. During mixing, the valve pressure was switched back to a nominal control pressure of 30 psi.

After mixing, each reaction step required a specific temporal temperature profile for denaturation, annealing, and enzyme inactivation, which is listed in the tables below. Otherwise, the default platform temperature was set to 4 °C. After the final stage, each isolated lane was flushed with nuclease-free water, and the double-stranded cDNA product was retrieved from the device into eight filtered gel loading tips along with 5  $\mu\text{L}$  water and dispensed into 0.2-mL PCR tubes; 24  $\mu\text{L}$  PCR mixture II of 1 $\times$  ExTaq buffer, 0.25 mM dNTP, 1  $\mu\text{M}$  V3-T24 primer, 1  $\mu\text{M}$  V1-T24 primer, and 0.05 unit/ $\mu\text{L}$  ExTaq Hot Start Version was added for a first round of 20 cycles of PCR amplification with the following temperature profile: 95 °C for 30 s, 67 °C for 1 min, and 72 °C for 3 min with a 6-s extension per cycle. The second round of PCR was performed in a standard tube-based format to avoid evaporation of water from the microfluidic device, which is possible during long durations at high temperature. During this off-chip PCR amplification, negative control experiments were included using the same water that was used to flush the chip instead of cDNA, confirming that there was undetectable contamination during this procedure. Samples were stored at  $-80$  °C until library preparation and sequencing.

**cDNA Preparation Protocol.** Below is a modified reagent list based on the single-cell transcriptome sequencing protocol from ref. 3 adjusted for the microfluidic platform. Here, we used two times the enzyme concentration as in the original protocol. For a typ-

ical experiment with a single device, we prepared 2–5  $\mu\text{L}$  for each reaction mix.

(Stage 1) Cell lysis: 70 °C for 90 s; 4 °C.

| Component                                            | Mix concentration             | Reaction concentration        |
|------------------------------------------------------|-------------------------------|-------------------------------|
| 10 $\times$ PCR buffer II (without $\text{MgCl}_2$ ) | 1.03 $\times$                 | 0.76 $\times$                 |
| 25 mM $\text{MgCl}_2$                                | 1.55 mM                       | 1.14 mM                       |
| 0.1 M DTT                                            | 5.15 mM                       | 3.8 mM                        |
| RNase inhibitor (40 units $\mu\text{L}^{-1}$ )       | 1.19 units $\mu\text{L}^{-1}$ | 0.88 units $\mu\text{L}^{-1}$ |
| SUPERase-In (20 units $\mu\text{L}^{-1}$ )           | 0.6 units $\mu\text{L}^{-1}$  | 0.44 units $\mu\text{L}^{-1}$ |
| 0.5 $\mu\text{M}$ UP1 primer                         | 28.6 nM                       | 21.2 nM                       |
| dNTP mix (2.5 mM each)                               | 0.05 mM (each)                | 0.038 mM (each)               |
| 2% (vol/vol) Tween 20                                | 0.2%                          | 0.15%                         |
| 10% Nonidet P-40                                     | 0.53%                         | 0.39%                         |
| Nuclease-free water                                  |                               |                               |

(Stage 2) Reverse transcription: 50 °C for 45 min; 72 °C for 20 min; 4 °C.

| Component                                                             | Mix concentration             | Reaction concentration        |
|-----------------------------------------------------------------------|-------------------------------|-------------------------------|
| 1 $\times$ Lysis buffer (without 10% Nonidet P-40)                    | 0.55 $\times$                 | 0.24 $\times$                 |
| SuperScript III reverse transcriptase (200 units $\mu\text{L}^{-1}$ ) | 57.5 units $\mu\text{L}^{-1}$ | 24.4 units $\mu\text{L}^{-1}$ |
| RNase inhibitor (40 units $\mu\text{L}^{-1}$ )                        | 3.48 units $\mu\text{L}^{-1}$ | 1.48 units $\mu\text{L}^{-1}$ |
| T4 gene 32 protein (5 mg $\text{mL}^{-1}$ )                           | 0.15 mg $\text{mL}^{-1}$      | 0.065 mg $\text{mL}^{-1}$     |
| 2% (vol/vol) Tween 20                                                 | 0.08%                         | 0.034%                        |

(Stage 3) Free primer removal: 37 °C for 33 min; 83 °C for 30 min; 4 °C.

| Component                                   | Mix concentration | Reaction concentration |
|---------------------------------------------|-------------------|------------------------|
| 10 $\times$ Exonuclease I buffer            | 1 $\times$        | 0.23 $\times$          |
| Exonuclease I (5 units $\mu\text{L}^{-1}$ ) | 1 $\times$        | 0.23 $\times$          |
| 2% (vol/vol) Tween 20                       | 0.2%              | 0.046%                 |
| Nuclease-free water                         |                   |                        |

(Stage 4) 3' Poly(A) tailing: 37 °C for 18 min; 72 °C for 15 min; 4 °C.

| Component                                            | Mix concentration            | Reaction concentration        |
|------------------------------------------------------|------------------------------|-------------------------------|
| 10 $\times$ PCR buffer II (without $\text{MgCl}_2$ ) | 1 $\times$                   | 0.47 $\times$                 |
| 25 mM $\text{MgCl}_2$                                | 1.5 mM                       | 0.7 mM                        |
| 100 mM dATP                                          | 3 mM                         | 1.4 mM                        |
| Terminal transferase (15 units $\mu\text{L}^{-1}$ )  | 1.5 units $\mu\text{L}^{-1}$ | 0.7 units $\mu\text{L}^{-1}$  |
| RNase H (2 units $\mu\text{L}^{-1}$ )                | 0.2 units $\mu\text{L}^{-1}$ | 0.09 units $\mu\text{L}^{-1}$ |
| 2% (vol/vol) Tween 20                                | 0.2%                         | 0.09%                         |
| Nuclease-free water                                  |                              |                               |

(Stage 5) Second-strand synthesis: 95 °C for 3 min; 50 °C for 2 min; 72 °C for 30 min; 4 °C.

| Component                                    | Mix concentration          | Reaction concentration       |
|----------------------------------------------|----------------------------|------------------------------|
| 10× Ex Taq buffer (with MgCl <sub>2</sub> )  | 1×                         | 0.86×                        |
| dNTP mix (2.5 mM each)                       | 0.25 mM                    | 0.21 mM                      |
| UP2 primer (100 μM)                          | 2 μM                       | 1.7 μM                       |
| TaKaRa Ex Taq HS (5 units μL <sup>-1</sup> ) | 0.1 units μL <sup>-1</sup> | 0.086 units μL <sup>-1</sup> |
| 2% (vol/vol) Tween 20                        | 0.2%                       | 0.17%                        |
| Nuclease-free water                          |                            |                              |

**Sequencing Library Preparation.** Amplified cDNA was purified and size-selected (>0.5 kb) with magnetic beads (Agencourt AMPure XP); 1 ng product of each sample was amplified by a second round of 10 cycles of PCR [95 °C for 3 min and then 10 cycles of 95 °C for 30 s, 67 °C for 1 min, and 72 °C for 6 min (+ 6 s each cycle)] using amine-blocked primers. The samples were then column-purified (ZYMO) and size-selected (>0.5 kb) with magnetic beads (Agencourt AMPure XP). An aliquot of 50 ng DNA from each sample was used as the starting amount for library preparation to ensure sample consistency. The Illumina HiSeq 2500 sequencing system (Illumina) was used for sequencing, and the library preparation kits (E7370) were purchased from New England Biolabs. Sequencing library construction and template preparation were performed according to the New England Biolabs library preparation protocols. We constructed a paired-end library with insert size of ~200 bp for each sample, and 12 cycles were performed during PCR amplification. Each sample was barcoded, and equal quantities of barcoded libraries were used for sequencing. All of the negative controls were treated similarly as above.

**Sequencing Data Analysis.** The original image data generated by the sequencer were converted into sequence data by base calling (Illumina pipeline CASAVA version 1.8.0). The raw reads were filtered to discard low-quality reads (reads containing more than 50 bases with quality value ≤ 5 and >10% bases as N). The results were clean reads. Adaptors with flanking polyA/T sequences were trimmed. Additionally, reads with AT content larger than 70% were also removed. Trimmed reads with length larger than 30 bp were kept. For paired-end reads, if only one end was kept, it was exported to another fastq file, which stored all single-end data. Both single- and paired-end reads were used in alignment. Filtered reads were mapped to the mouse reference sequence downloaded from the University of California, Santa Cruz table browser with Burrows–Wheeler Aligner (version 0.6.2-r126). The reads that mapped to Refseq genes were counted and converted to reads per kilobase transcript per million mapped reads using the length of the longest transcript of the gene. For long noncoding RNA detection, the filtered and trimmed reads

were mapped to the transcript reference downloaded from GENCODE M2 annotation. The expression levels of long non-coding RNAs were counted and normalized in the same way as the coding genes. Hierarchical clustering was performed using the statistical programming language R. The log<sub>10</sub>-transformed reads per kilobase transcript per million mapped read values of the genes that showed significant variability between six mESCs and six mouse embryonic fibroblasts were used to generate a scaled matrix. Then, the function heatmap.2 from the R package gplots was used to perform hierarchical clustering and generate the heat maps in Fig. 5.

**Bulk RNA Extraction and Quantification.** Mouse ES cells from the 129 mouse strain were enumerated by a hemocytometer with three replications; ~5 × 10<sup>5</sup> cells were used for RNA extraction following the standard instructions of the RNeasy Mini Kit (Qiagen), and the RNA samples were digested with DNase I on column to remove contaminating genomic DNA. The concentration of extracted RNA was quantified by Qubit (Life Technologies), and total yield was ~10 μg, from which we estimated 20 pg total RNA per mESC on average; 100 ng total RNA was prepared for library construction following Illumina's TruSeq RNA sample preparation protocol and sequenced on the Illumina HiSeq 2500. This library was used for the bulk transcriptome analysis. Technical replicates were generated by diluting the extracted total RNA to desired final concentrations.

**Exogenous RNA Spike-In.** External RNA Controls Consortium RNA Spike-In Mix 1 was purchased from Life Technologies and stored at –80 °C. For single-cell spike-in experiments, the External RNA Controls Consortium Mix was diluted in buffer [RNase Inhibitor (1 unit μL<sup>-1</sup>) and 0.05% Tween 20] and added to the lysis buffer for a total dilution of 1,000:1.

The spike-in containing genes encoding red fluorescent protein (RFP), green fluorescent protein (GFP), and cre recombinase (Cre) was prepared in the following manner. Full-length RFP, GFP, and Cre genes were inserted into a pCS2 plasmid vector with an 80-bp poly(A) sequence at multiple clone sites. To obtain transcripts of the RFP, GFP, and Cre genes with poly(A) sequence, the plasmids were linearized at the XbaI site downstream from the poly(A) sequence, and SP6 RNA polymerase (Promega) was used for in vitro transcription. All three targeted RNA products were purified according to the standard RNeasy Mini Kit's protocol (Qiagen) for eliminating DNA contamination. The concentration was measured by Nanodrop (Thermo Fisher Scientific), and the quantity of each gene was obtained with the known molecular weight. *RFP*, *GFP*, and *Cre* RNA were stored at the concentrations of 2 × 10<sup>10</sup>, 2 × 10<sup>9</sup>, and 2 × 10<sup>8</sup> molecule/μL, respectively, at –80 °C. For a single-cell experiment, the *RFP-GFP-Cre* spike-in was diluted and added to the lysis buffer with a total dilution of 300,000:1. Spike-in experiments were also performed on one device at five times the concentration stated (Table S1).

1. Unger MA, Chou HP, Thorsen T, Scherer A, Quake SR (2000) Monolithic microfabricated valves and pumps by multilayer soft lithography. *Science* 288(5463):113–116.
2. Hansen CL, Sommer MOA, Quake SR (2004) Systematic investigation of protein phase behavior with a microfluidic formulator. *Proc Natl Acad Sci USA* 101(40):14431–14436.

3. Tang F, et al. (2010) RNA-Seq analysis to capture the transcriptome landscape of a single cell. *Nat Protoc* 5(3):516–535.

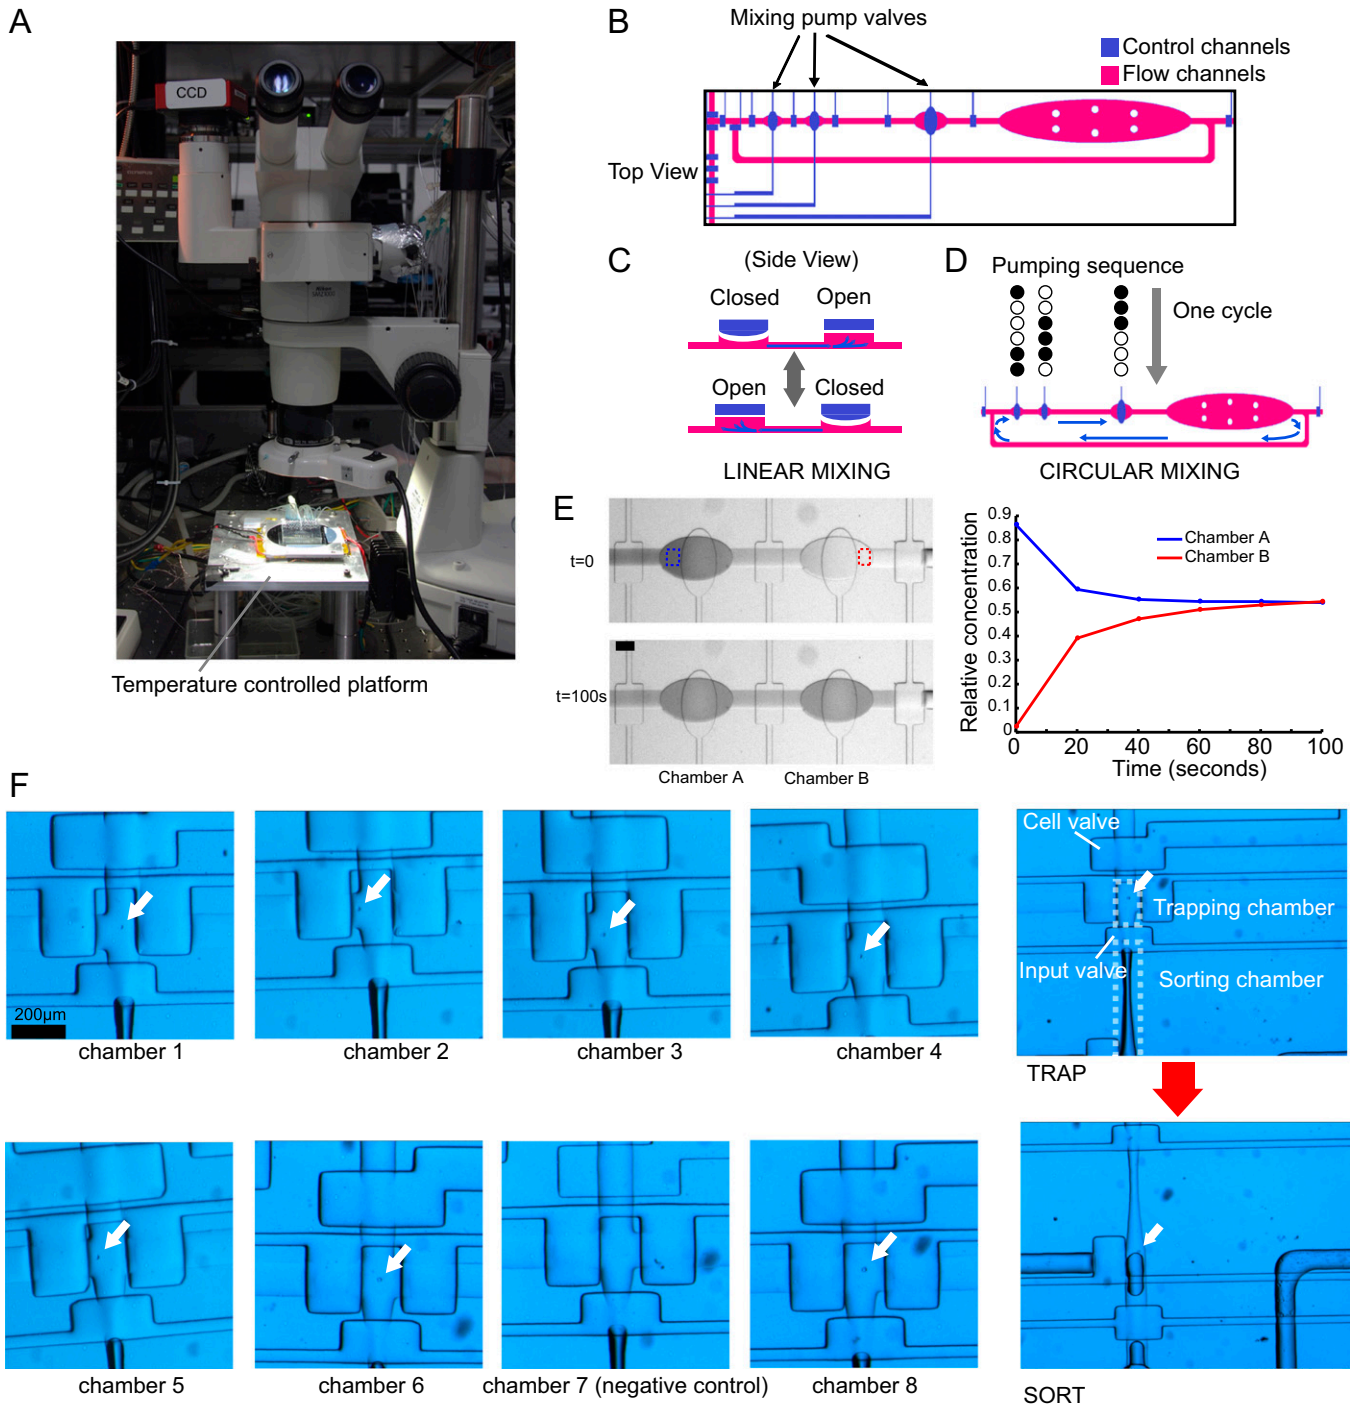

**Fig. S1.** Experimental setup. (A) A photograph of the experimental setup depicting the microfluidic device atop a temperature-controlled platform. (B) Three large valves are positioned over three of the reaction chambers. The control pressure of these valves can be adjusted independently from the rest of the control manifold and regulated to optimize mixing. (C) This linear mixing scheme is used in stages 2–4 of the reaction pipeline. Reactants were pushed back and forth between chambers to accelerate diffusive mixing. (D) In the final reaction stage, a ring path is open, and mixing can be achieved by using a peristaltic pumping sequence to circulate reactants around the ring and accelerate diffusive mixing. (E) Micrograph of the linear mixing scheme using dye to visualize reagents (Left). (Scale bar: 150  $\mu\text{m}$ .) Mean transmitted intensity was measured in the regions indicated in chambers A and B every 20 s during mixing (SI Materials and Methods). The relative concentration of dye is plotted for both chambers during 100 s of mixing (Right). (F) Micrographs of the eight trapping events during a typical experiment. White arrows indicate the trapped cell. After trapping, a cell can be released if it looks unhealthy or if more than one cell was trapped. Right shows the sorting sequence in which, after a cell is trapped, the input valve and an independently addressable cell valve are opened, and the cell and surrounding media are pushed into an empty sorting chamber.







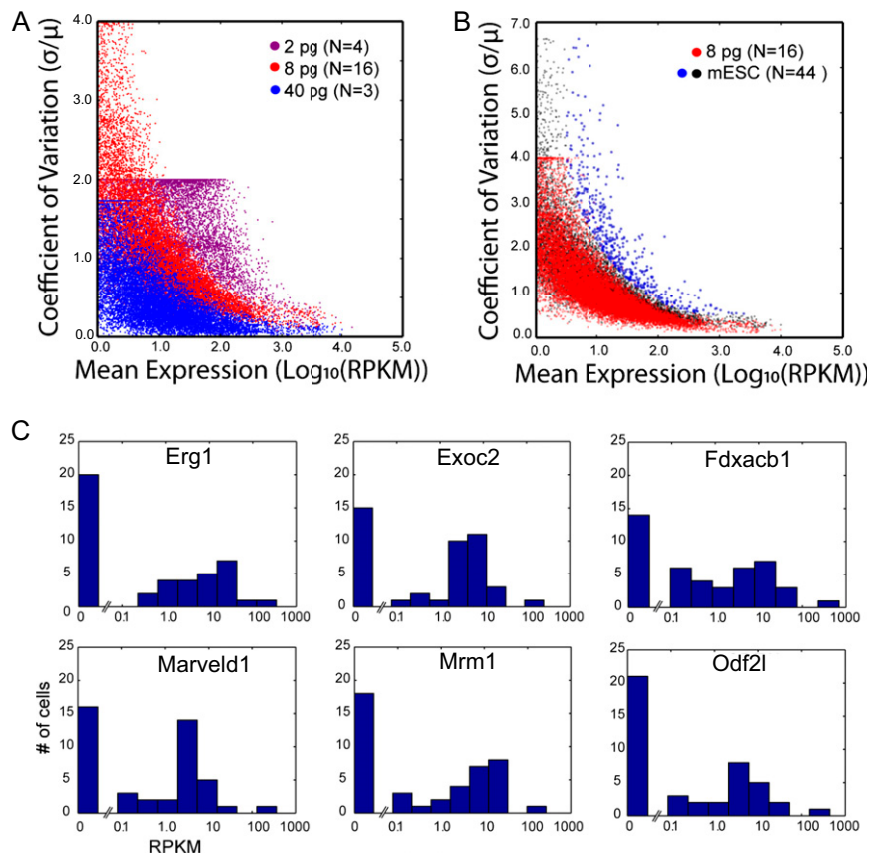

**Fig. S5.** Technical variation and biological variation. (A) Coefficient of variation (CV) plotted against  $\text{log}_{10}$ -transformed mean expression of genes detected in technical replicates of 40 pg (blue), 8 pg (red), and 2 pg (purple) extracted RNA. The maximum CV is defined by  $\sqrt{N}$ , and data points that cluster at this cutoff represent genes that were only detected in a one of the samples. (B) CV plotted against  $\text{log}_{10}$ -transformed mean expression of genes detected in 16 8-pg technical replicates and 44 single mESC libraries. Endogenously expressed genes in the mESC set that showed CV larger than 3 SDs from the mean CV in the 8-pg set were marked in blue and considered to show biological variability that was detectable above the technical noise. These 475 genes are listed in [Dataset S1](#). (C) Histograms of the distribution of expression in 44 single mESCs for six highly variable genes listed in [Dataset S1](#).









**Table S1. Annotated list of 102 libraries from cDNA prepared in the microfluidic device and a tube**

| Sample ID | Sample name | Description           | Notes            | Spike-in dilution (ERCC/Cre) |
|-----------|-------------|-----------------------|------------------|------------------------------|
| 0         | T0          | Tube negative control | Negative control |                              |
| 1         | T8-1        | 8-pg tube             |                  |                              |
| 2         | T8-2        | 8-pg tube             |                  |                              |
| 3         | T8-3        | 8-pg tube             |                  |                              |
| 4         | T40-1       | 40-pg tube            |                  |                              |
| 5         | T40-2       | 40-pg tube            |                  |                              |
| 6         | T40-3       | 40-pg tube            |                  |                              |
| 7         | T100        | 100-ng tube           |                  |                              |
| 8         | B2-1        | 2-pg chip             |                  |                              |
| 9         | B2-2        | 2-pg chip             |                  |                              |
| 10        | B2-3        | 2-pg chip             |                  |                              |
| 11        | B2-4        | 2-pg chip             |                  |                              |
| 12        | B8-1        | 8-pg chip             |                  |                              |
| 13        | B8-2        | 8-pg chip             |                  |                              |
| 14        | B8-3        | 8-pg chip             |                  |                              |
| 15        | B8-4        | 8-pg chip             |                  |                              |
| 16        | B8-5        | 8-pg chip             |                  |                              |
| 17        | B8-6        | 8-pg chip             |                  |                              |
| 18        | B8-7        | 8-pg chip             |                  |                              |
| 19        | B8-8        | 8-pg chip             |                  |                              |
| 20        | B8-9        | 8-pg chip             |                  |                              |
| 21        | B8-10       | 8-pg chip             |                  |                              |
| 22        | B8-11       | 8-pg chip             |                  |                              |
| 23        | B8-12       | 8-pg chip             |                  |                              |
| 24        | B8-13       | 8-pg chip             |                  |                              |
| 25        | B8-14       | 8-pg chip             |                  |                              |
| 26        | B8-15       | 8-pg chip             |                  |                              |
| 27        | B8-16       | 8-pg chip             |                  |                              |
| 28        | B40-1       | 40-pg chip            |                  |                              |
| 29        | B40-2       | 40-pg chip            |                  |                              |
| 30        | B40-3       | 40-pg chip            |                  |                              |
| 31        | mESC1       | mESC two-cell chip    | Two-cell device  |                              |
| 32        | mESC2       | mESC two-cell chip    | Two-cell device  |                              |
| 33        | mESC3       | mESC two-cell chip    | Two-cell device  |                              |
| 34        | mESC4       | mESC two-cell chip    | Negative control |                              |
| 35        | mESC5       | mESC two-cell chip    | Two-cell device  |                              |
| 36        | mESC6       | mESC two-cell chip    | Two-cell device  |                              |
| 37        | mESC7       | mESC two-cell chip    | Two-cell device  |                              |
| 38        | mESC8       | mESC two-cell chip    | Two-cell device  |                              |
| 39        | mESC9       | mESC eight-cell chip  |                  |                              |
| 40        | mESC10      | mESC eight-cell chip  |                  |                              |
| 41        | mESC11      | mESC eight-cell chip  |                  |                              |
| 42        | mESC12      | mESC eight-cell chip  |                  |                              |
| 43        | mESC13      | mESC eight-cell chip  |                  |                              |
| 44        | mESC14      | mESC eight-cell chip  | Discarded        |                              |
| 45        | mESC15      | mESC eight-cell chip  |                  |                              |
| 46        | mESC16      | mESC eight-cell chip  |                  |                              |
| 47        | mESC17      | mESC eight-cell chip  |                  |                              |
| 48        | mESC18      | mESC eight-cell chip  |                  |                              |

**Table S1. Cont.**

| Sample ID | Sample name | Description          | Notes            | Spike-in dilution (ERCC/Cre) |
|-----------|-------------|----------------------|------------------|------------------------------|
| 49        | mESC19      | mESC eight-cell chip |                  |                              |
| 50        | mESC20      | mESC eight-cell chip |                  |                              |
| 51        | mESC21      | mESC eight-cell chip | Discarded        |                              |
| 52        | mESC22      | mESC eight-cell chip |                  |                              |
| 53        | mESC23      | mESC eight-cell chip |                  |                              |
| 54        | mESC24      | mESC eight-cell chip |                  |                              |
| 55        | mESC25      | mESC eight-cell chip |                  |                              |
| 56        | mESC26      | mESC eight-cell chip |                  |                              |
| 57        | mESC27      | mESC eight-cell chip |                  |                              |
| 58        | mESC28      | mESC eight-cell chip |                  |                              |
| 59        | mESC29      | mESC eight-cell chip | Negative control |                              |
| 60        | mESC30      | mESC eight-cell chip |                  |                              |
| 61        | mESC31      | mESC eight-cell chip | Discarded        |                              |
| 62        | mESC32      | mESC eight-cell chip |                  |                              |
| 63        | mESC33      | mESC eight-cell chip |                  |                              |
| 64        | mESC34      | mESC eight-cell chip |                  |                              |
| 65        | mESC35      | mESC eight-cell chip |                  |                              |
| 66        | mESC36      | mESC eight-cell chip |                  |                              |
| 67        | mESC37      | mESC eight-cell chip | Discarded        | 200:1/60,000:1               |
| 68        | mESC38      | mESC eight-cell chip |                  | 200:1/60,000:1               |
| 69        | mESC39      | mESC eight-cell chip |                  | 200:1/60,000:1               |
| 70        | mESC40      | mESC eight-cell chip |                  | 200:1/60,000:1               |
| 71        | mESC41      | mESC eight-cell chip |                  | 200:1/60,000:1               |
| 72        | mESC42      | mESC eight-cell chip | Negative control | 200:1/60,000:1               |
| 73        | mESC43      | mESC eight-cell chip | Negative control | 200:1/60,000:1               |
| 74        | mESC44      | mESC eight-cell chip | Discarded        | 200:1/60,000:1               |
| 75        | mESC45      | mESC eight-cell chip |                  | 1,000:1/300,000:1            |
| 76        | mESC46      | mESC eight-cell chip |                  | 1,000:1/300,000:1            |
| 77        | mESC47      | mESC eight-cell chip |                  | 1,000:1/300,000:1            |
| 78        | mESC48      | mESC eight-cell chip |                  | 1,000:1/300,000:1            |
| 79        | mESC49      | mESC eight-cell chip | Negative control | 1,000:1/300,000:1            |
| 80        | mESC50      | mESC eight-cell chip | Discarded        | 1,000:1/300,000:1            |
| 81        | mESC51      | mESC eight-cell chip |                  | 1,000:1/300,000:1            |
| 82        | mESC52      | mESC eight-cell chip |                  | 1,000:1/300,000:1            |
| 83        | mESC53      | mESC eight-cell chip | Discarded        | 1,000:1/300,000:1            |
| 84        | mESC54      | mESC eight-cell chip |                  | 1,000:1/300,000:1            |
| 85        | mESC55      | mESC eight-cell chip |                  | 1,000:1/300,000:1            |
| 86        | mESC56      | mESC eight-cell chip |                  | 1,000:1/300,000:1            |
| 87        | mESC57      | mESC eight-cell chip | Negative control | 1,000:1/300,000:1            |
| 88        | mESC58      | mESC eight-cell chip | Negative control | 1,000:1/300,000:1            |
| 89        | mESC59      | mESC eight-cell chip | *                | 1,000:1/300,000:1            |
| 90        | mESC60      | mESC eight-cell chip | *                | 1,000:1/300,000:1            |
| 91        | mESC61      | mESC eight-cell chip | Discarded        | 1,000:1/300,000:1            |
| 92        | mESC62      | mESC eight-cell chip | Discarded        | 1,000:1/300,000:1            |
| 93        | mESC63      | mESC eight-cell chip | *                | 1,000:1/300,000:1            |
| 94        | MEF1        | MEF eight-cell chip  |                  | 1,000:1/300,000:1            |
| 95        | MEF2        | MEF eight-cell chip  |                  | 1,000:1/300,000:1            |
| 96        | MEF3        | MEF eight-cell chip  |                  | 1,000:1/300,000:1            |
| 97        | MEF4        | MEF eight-cell chip  |                  | 1,000:1/300,000:1            |
| 98        | MEF5        | MEF eight-cell chip  |                  | 1,000:1/300,000:1            |

**Table S1. Cont.**

| Sample ID | Sample name | Description         | Notes            | Spike-in dilution (ERCC/Cre) |
|-----------|-------------|---------------------|------------------|------------------------------|
| 99        | MEF6        | MEF eight-cell chip |                  | 1,000:1/300,000:1            |
| 100       | MEF7        | MEF eight-cell chip | Negative control | 1,000:1/300,000:1            |
| 101       | MEF8        | MEF eight-cell chip | Negative control | 1,000:1/300,000:1            |

Samples separated with and without gray shading represent experiments prepared on the same device. Samples marked with a (\*) showed an abnormal gene expression profile and were excluded from the ensemble analysis. ERCC, External RNA Controls Consortium.

**Table S2. Gene ontology analysis of mESCs and MEFs**

| Gene ontology ID  | Gene ontology term             | <i>P</i> value       |
|-------------------|--------------------------------|----------------------|
| Enriched in mESCs |                                |                      |
| 0019827           | Stem cell maintenance          | 0.011                |
| 0048864           | Stem cell development          | 0.012                |
| 0048863           | Stem cell differentiation      | 0.022                |
| 0007281           | Germ cell development          | 0.038                |
| 0001701           | In utero embryonic development | 0.047                |
| Enriched in MEFs  |                                |                      |
| 0001568           | Blood vessel development       | $7.7 \times 10^{-9}$ |
| 0007155           | Cell adhesion                  | $1.7 \times 10^{-8}$ |
| 0008083           | Growth factor activity         | $1.8 \times 10^{-7}$ |
| 0001558           | Regulation of cell growth      | $1.1 \times 10^{-6}$ |
| 0051270           | Regulation of cell motion      | $5.4 \times 10^{-5}$ |
| 0042692           | Muscle cell differentiation    | $1.4 \times 10^{-5}$ |
| 0015629           | Actin cytoskeleton             | $5.0 \times 10^{-5}$ |
| 0005581           | Collagen                       | $7.8 \times 10^{-5}$ |
| 0001501           | Skeletal system development    | $2.8 \times 10^{-4}$ |

## Other Supporting Information Files

[Dataset S1 \(XLSX\)](#)
